# Supplementary material for: Activation of AMPK sensitizes medulloblastoma to Vismodegib and overcomes Vismodegib‐resistance
Source: PubMed Central journal article supplement — FASEB Bioadv. 2021 Mar 17;3(6):459–69. doi: 10.1096/fba.2020-00032 (PMC8171304; doi:10.1096/fba.2020-00032), 2021-03-17
Supplement: FBA2-3-459-s001.pdf [file FBA2-3-459-s001.pdf]

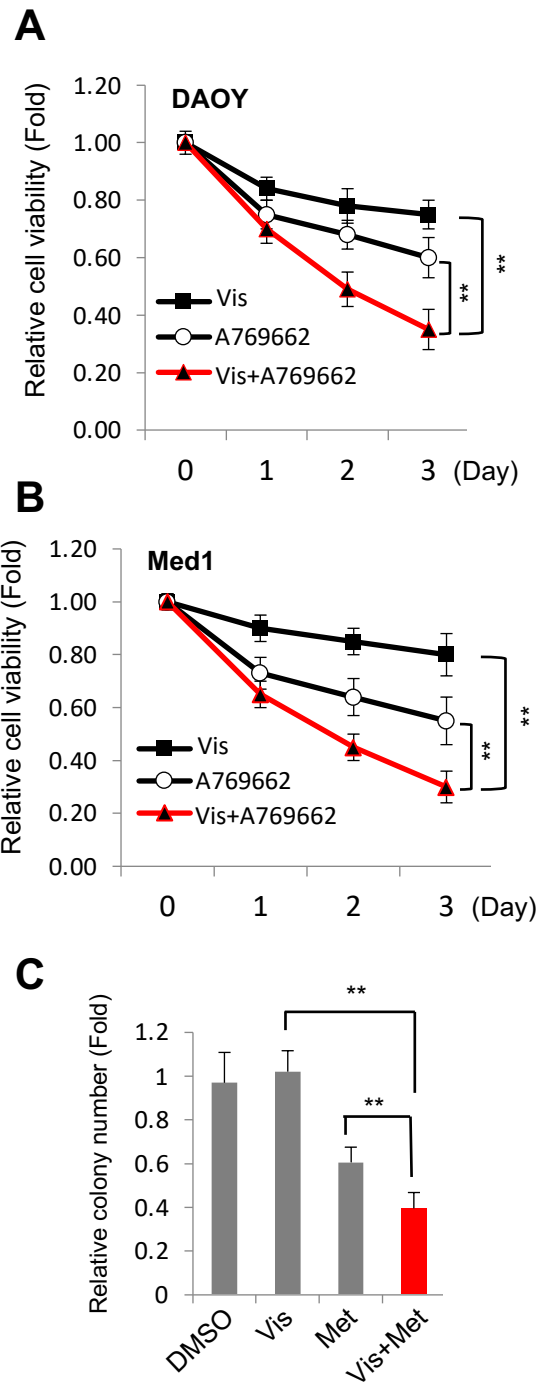

## Supplemental Figure 2

**A**

| MB11                                                                                                                               |                |                |                        |
|------------------------------------------------------------------------------------------------------------------------------------|----------------|----------------|------------------------|
| Vismodegib ( $\mu\text{M}$ )                                                                                                       | Metformin (mM) | Killing Effect | Combination index (CI) |
| 40                                                                                                                                 | 10             | 0.79           | 0.78232                |
| 60                                                                                                                                 | 10             | 0.892          | 0.60672                |
| 80                                                                                                                                 | 10             | 0.926          | 0.59870                |
| 100                                                                                                                                | 10             | 0.936          | 0.66080                |
| Chou-Talalay quantitative definition for additive effect (CI = 1), synergism (CI < 1), and antagonism (CI > 1) in drug combination |                |                |                        |

**B**

| DAOY                                                                                                                                |                |                |                        |
|-------------------------------------------------------------------------------------------------------------------------------------|----------------|----------------|------------------------|
| Vismodegib ( $\mu\text{M}$ )                                                                                                        | Metformin (mM) | Killing Effect | Combination index (CI) |
| 40                                                                                                                                  | 10             | 0.662          | 0.98673                |
| 60                                                                                                                                  | 10             | 0.784          | 0.83380                |
| 80                                                                                                                                  | 10             | 0.809          | 0.88266                |
| 100                                                                                                                                 | 10             | 0.888          | 0.74332                |
| Chou-Talalay quantitative definition for additive effect (CI = 1), synergism (CI < 1), and antagonism (CI > 1) in drug combination. |                |                |                        |

A

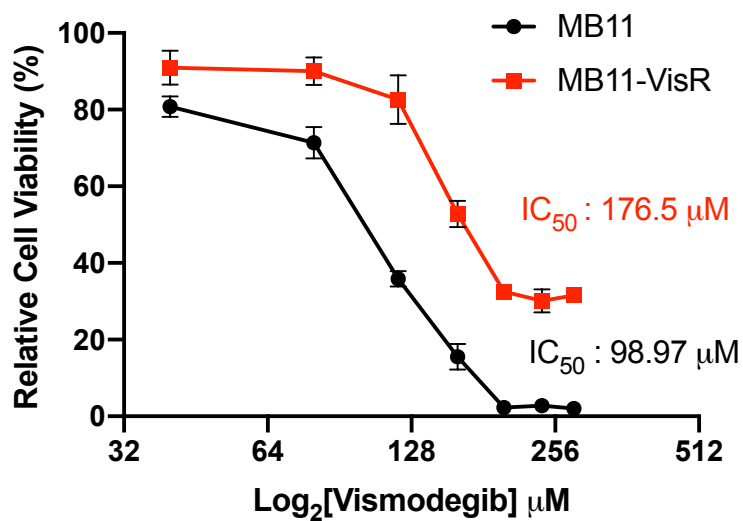

B

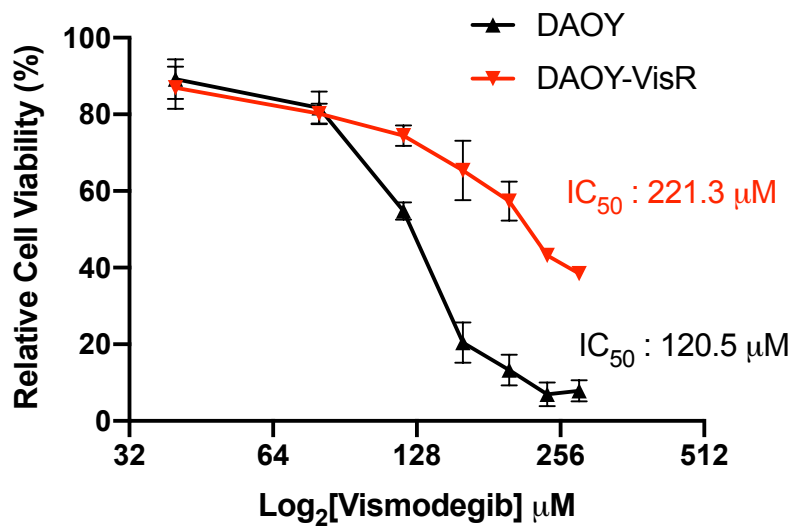

**A**

| MB11-VisR                                                                                                                                  |                |                |                        |
|--------------------------------------------------------------------------------------------------------------------------------------------|----------------|----------------|------------------------|
| Vismodegib ( $\mu\text{M}$ )                                                                                                               | Metformin (mM) | Killing Effect | Combination index (CI) |
| 40                                                                                                                                         | 10             | 0.32           | 1.86983                |
| 60                                                                                                                                         | 10             | 0.415          | 1.41692                |
| 80                                                                                                                                         | 10             | 0.469          | 1.29105                |
| 100                                                                                                                                        | 10             | 0.575          | 1.00714                |
| 120                                                                                                                                        | 10             | 0.536          | 1.24318                |
| 160                                                                                                                                        | 10             | 0.756          | 0.72770                |
| 200                                                                                                                                        | 10             | 0.828          | 0.64337                |
| 240                                                                                                                                        | 10             | 0.91           | 0.47581                |
| Chou-Talalay offers quantitative definition for additive effect (CI = 1), synergism (CI < 1), and antagonism (CI > 1) in drug combinations |                |                |                        |

**B**

| DAOY-VisR                                                                                                                                  |                |                |                        |
|--------------------------------------------------------------------------------------------------------------------------------------------|----------------|----------------|------------------------|
| Vismodegib ( $\mu\text{M}$ )                                                                                                               | Metformin (mM) | Killing Effect | Combination index (CI) |
| 40                                                                                                                                         | 10             | 0.322          | 1.76747                |
| 60                                                                                                                                         | 10             | 0.275          | 2.31826                |
| 80                                                                                                                                         | 10             | 0.418          | 1.48716                |
| 100                                                                                                                                        | 10             | 0.516          | 1.15830                |
| 120                                                                                                                                        | 10             | 0.739          | 0.55717                |
| 160                                                                                                                                        | 10             | 0.91           | 0.22257                |
| 200                                                                                                                                        | 10             | 0.906          | 0.25887                |
| 240                                                                                                                                        | 10             | 0.91           | 0.27526                |
| Chou-Talalay offers quantitative definition for additive effect (CI = 1), synergism (CI < 1), and antagonism (CI > 1) in drug combinations |                |                |                        |

# Supplemental Figure 5

**A**

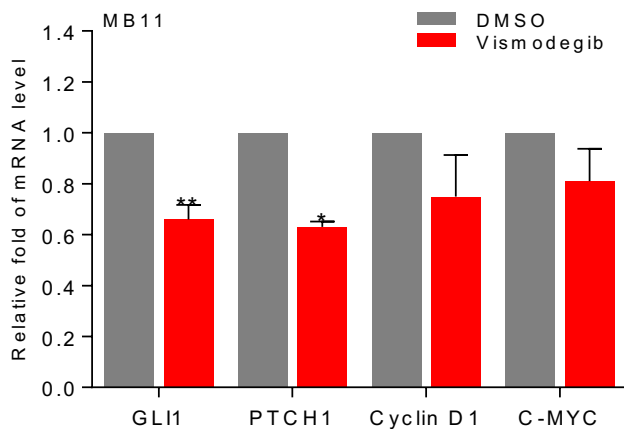

**B**

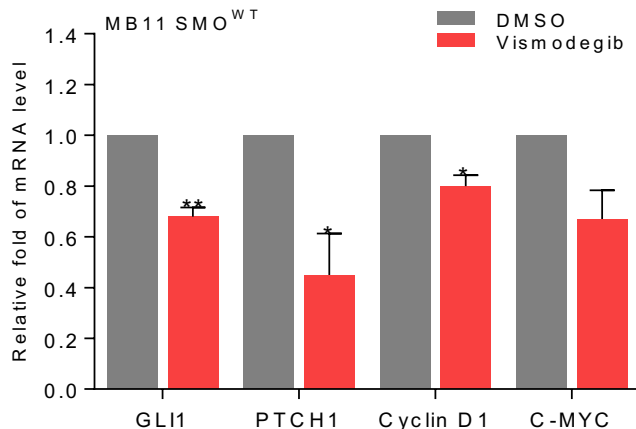

**C**

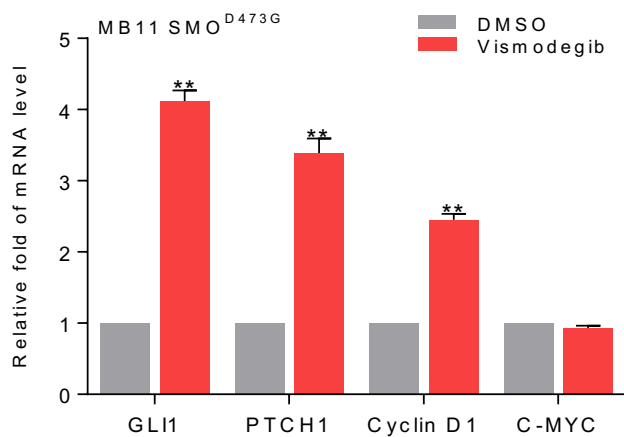

**D**

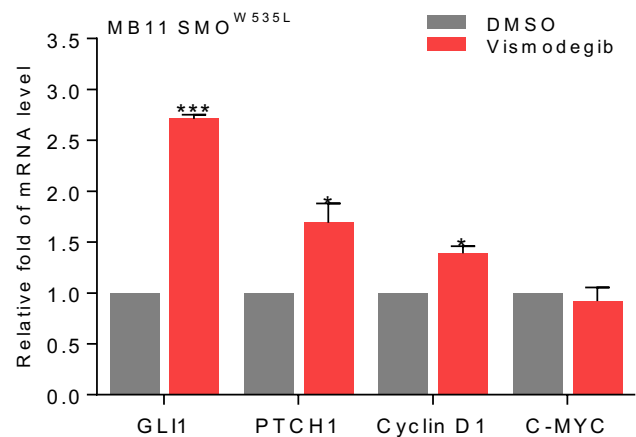

**E**

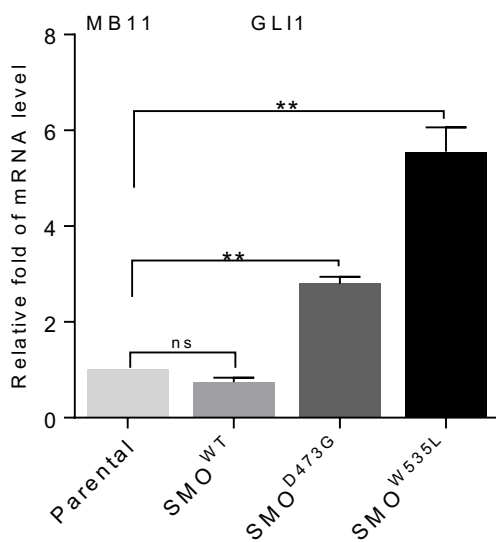

**F**

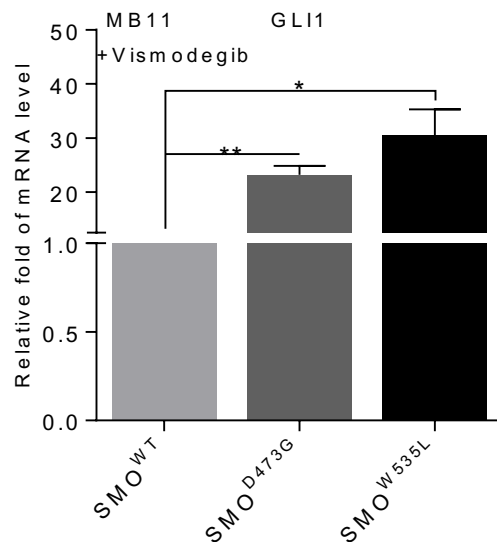

**A**

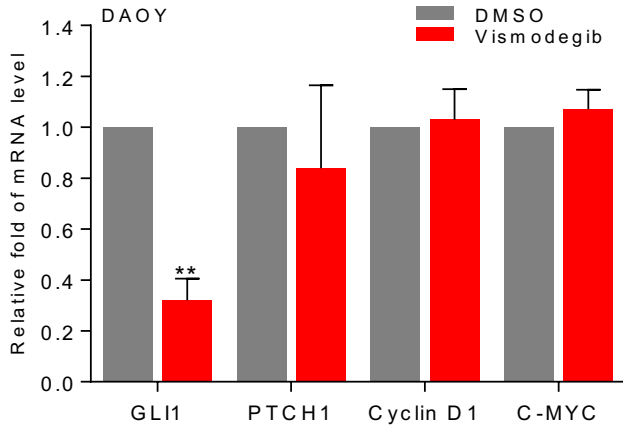

**B**

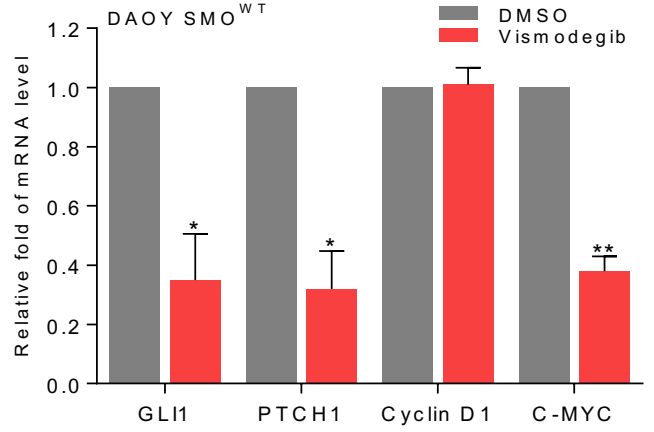

**C**

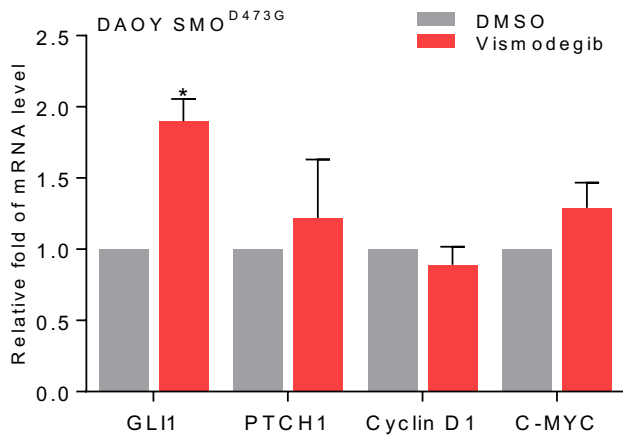

**D**

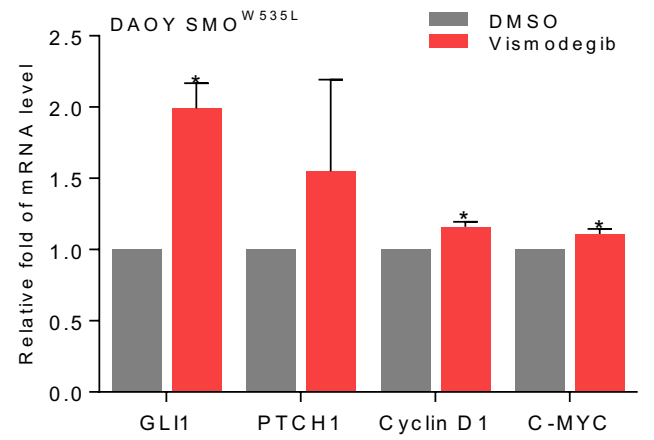

**E**

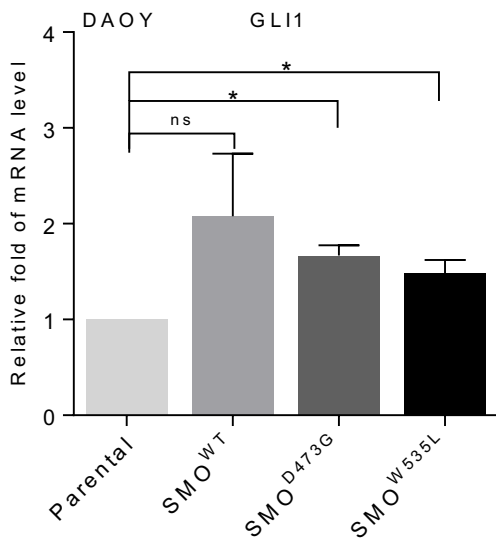

**F**

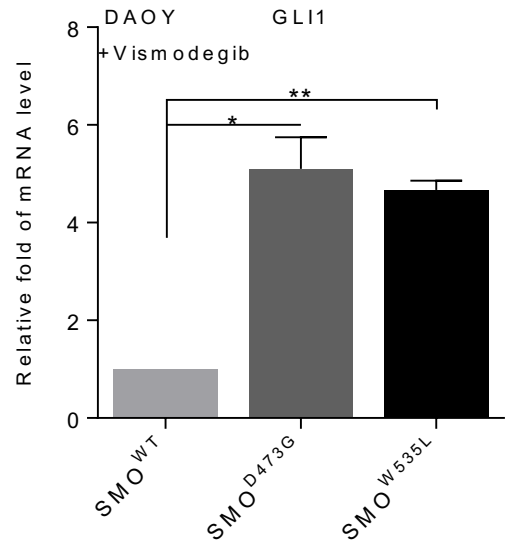

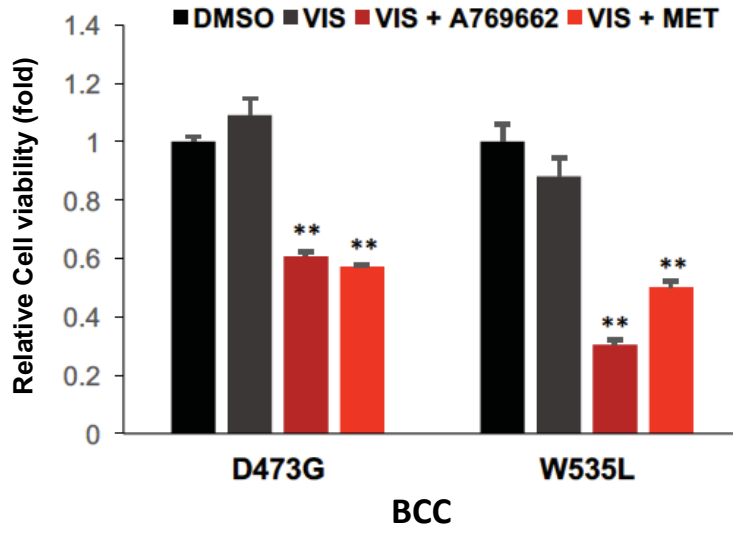

## SUPPLEMENTAL FIGURE LEGENDS

**Supplemental Figure 1. Combination of AMPK agonist and SMO inhibitor has better growth inhibitory effect on MB cell growth and colony formation.** Human MB cell line, **(A)** DAOY and mouse MB cell line **(B)** Med1 were treated with DMSO, Vismodegib (10  $\mu$ M), A769662 (20  $\mu$ M), Vis and A769662 (10  $\mu$ M+20  $\mu$ M) and subjected to MTT cell growth assay for three consecutive days. **(C)** Med1 cells were treated with DMSO, Vismodegib (10  $\mu$ M), Metformin (5 mM), Vis and Met (10  $\mu$ M+5 mM) and subjected to soft agar colony formation assay for 2 weeks. The experimental points were in triplicate and repeated three times (\*\*\*)  $p < 0.01$ ).

**Supplemental Figure 2. Metformin synergizes with Vismodegib on MB cells.** As showed in Figure 1F (MB11) and 1H (DAOY), MB11 and DAOY cells were treated with Vismodegib (from 40 to 100  $\mu$ M), Metformin (10 mM) and Vismodegib plus Metformin for 48 hours and subjected to cell growth assay. The synergism of Metformin and Vismodegib was calculated by Chou-Talalay quantitative definition as showed in **(A)** and **(B)**. Combination index (CI)  $< 1$  means synergism in drug combination.

**Supplemental Figure 3. MB11-VisR and DAOY-VisR cell lines were resistant to Vismodegib.**

**(A)** MB11-VisR and **(B)** DAOY-VisR cell lines were treated with Vismodegib from 40 to 280  $\mu$ M for 48 hours and subjected to MTT cell growth assay. The experimental points were in triplicate and repeated three times (\*\*\*)  $p < 0.01$ ).



**Supplemental Figure 4. Metformin synergizes with vismodegib on MB-VisR cells.**

As showed in Figure 4B (MB11-VisR) and 4D (DAOY-VisR), MB-VisR cells were treated with DMSO, Vismodegib (From 40 to 240  $\mu$ M), Metformin (10 mM), Vismodegib (From 40 to 240  $\mu$ M) and Metformin (10 mM) for 48 hours and subjected to cell growth assay. The synergism of Metformin and Vismodegib was calculated by Chou-Talalay quantitative definition as showed in **(A) and (B)**. Combination index (CI) <1 means synergism in drug combination.

**Supplemental Figure 5. MB11-SMO<sup>D473G</sup> and SMO<sup>W535L</sup> MB stable cells are resistant to Vismodegib.** **(A)** MB11, **(B)** MB11-SMO<sup>WT</sup>, **(C)** MB11-SMO<sup>D473G</sup> and **(D)** MB11-SMO<sup>W535L</sup> cell lines were treated with Vismodegib (10  $\mu$ M) for 24 hours and mRNA was collected, and the amount of HH/GLI1 downstream targets, *GLI1*, *PTCH1*, *Cyclin D1* and *C-MYC* mRNA was analyzed by qRT-PCR with *GAPDH* mRNA as the internal control. The bars indicate mRNA level relative to that of DMSO-treated cells. **(E)** In MB11 Parental, MB11-SMO<sup>WT</sup>, MB11-SMO<sup>D473G</sup> and MB11-SMO<sup>W535L</sup> cell lines, *GLI1* mRNA was analyzed by qRT-PCR with *GAPDH* mRNA as the internal control. The bars indicate mRNA level relative to that of MB11 Parental cell line. **(F)** MB11-SMO<sup>WT</sup>, MB11-SMO<sup>D473G</sup> and MB11-SMO<sup>W535L</sup> cell lines were treated with Vismodegib (10  $\mu$ M) for 24 hours and mRNA was collected. *GLI1* mRNA was analyzed by qRT-PCR with *GAPDH* mRNA as the internal control. The bars indicate mRNA level relative to that of Vismodegib treated MB11-SMO<sup>WT</sup> cell line. All the experimental points were in triplicate and independently repeated three times (“\*” p<0.05, “\*\*” p<0.01, “\*\*\*” p<0.001; “ns” non-significant).

**Supplemental Figure 6. DAOY-SMO<sup>D473G</sup> and SMO<sup>W535L</sup> MB stable cells are resistant to Vismodegib.** (A) DAOY, (B) DAOY-SMO<sup>WT</sup>, (C) DAOY-SMO<sup>D473G</sup> and (D) DAOY-SMO<sup>W535L</sup> cell lines were treated with Vismodegib (10  $\mu$ M) for 24 hours and mRNA was collected, and the amount of HH/GLI1 downstream targets, *GLI1*, *PTCH1*, *Cyclin D1* and *C-MYC* mRNA was analyzed by qRT-PCR with *GAPDH* mRNA as the internal control. The bars indicate mRNA level relative to that of DMSO-treated cells. (E) In DAOY Parental, DAOY-SMO<sup>WT</sup>, DAOY-SMO<sup>D473G</sup> and DAOY-SMO<sup>W535L</sup> cell lines, *GLI1* mRNA was analyzed by qRT-PCR with *GAPDH* mRNA as the internal control. The bars indicate mRNA level relative to that of DAOY Parental cell line. (F) DAOY-SMO<sup>WT</sup>, DAOY-SMO<sup>D473G</sup> and DAOY-SMO<sup>W535L</sup> cell lines were treated with Vismodegib (10  $\mu$ M) for 24 hours and mRNA was collected. *GLI1* mRNA was analyzed by qRT-PCR with *GAPDH* mRNA as the internal control. The bars indicate mRNA level relative to that of Vismodegib treated DAOY-SMO<sup>WT</sup> cell line. All the experimental points were in triplicate and independently repeated three times (“\*”  $p < 0.05$ , “\*\*”  $p < 0.01$ ; “ns” non-significant).

**Supplemental Figure 7. Combination of Vismodegib and AMPK agonist exerts best killing effect on SMO mutant variant BCC.** SMO<sup>D473G</sup> or SMO<sup>W535L</sup> BCC cells were seeded into 96-well plates and allowed to grow for 24 hours, after which medium was replaced with either 100nM Vismodegib (VIS), 0.75 mM A769662, 100  $\mu$ M Metformin or a combination of Vismodegib and A769662 or Vismodegib and Metformin at the indicated concentrations. Cells were cultured in drug treatment for 48 hours after which MTT assay

was performed. All the experimental points were in triplicate and independently repeated three times (\*\*\*)  $p < 0.01$ ).
